# Supplementary material for: First Functional and Mutational Analysis of Group 3 N-Acetylneuraminate Lyases from Lactobacillus antri and Lactobacillus sakei 23K
Source: PLOS journal article supplement (doi:10.1371/journal.pone.0096976), 2014-05-09
Supplement: S9 (10.1371/journal.pone.0096976.s009) [file journal.pone.0096976.s009]

**Table S2** Purification of recombinant LaNAL.

| <b>Purification Step</b>           | <b>Volume<br/>(mL)</b> | <b>Total<br/>Activity<br/>(U)</b> | <b>Total<br/>protein<br/>(mg)</b> | <b>Specific<br/>activity<br/>(U mg<sup>-1</sup>)</b> | <b>Purification<br/>factor</b> | <b>Yield<br/>(%)</b> |
|------------------------------------|------------------------|-----------------------------------|-----------------------------------|------------------------------------------------------|--------------------------------|----------------------|
| <b>Crude extract<sup>†</sup></b>   | 990                    | 6848                              | 3217                              | 2.1                                                  | 1                              | 100                  |
| <b>100 kDa<br/>Ultrafiltration</b> | 220                    | 5314                              | 1762                              | 3.0                                                  | 1.4                            | 77.6                 |
| <b>HiPrep IMAC</b>                 | 324                    | 5137                              | 631                               | 8.1                                                  | 2.6                            | 75.0                 |

<sup>†</sup>Crude extract represents the volume obtained after lysis and centrifugation of cell debris and DNase treatment corresponding to a 4 L culture broth. See Material and Methods for details.
